# Supplementary material for: Rivers under Ice: Evaluating Simulated Morphodynamics through a Riffle-Pool Sequence
Source: MDPI journal article supplement (doi:10.3390/w15081604), 2023-04-20
Supplement: s1 [file s1]

Archive with 1 entries (1 files):
- water-2306347-supplementary.pdf
